# Supplementary material for: HSPB1 Enhances SIRT2-Mediated G6PD Activation and Promotes Glioma Cell Proliferation
Source: PubMed Central journal article supplement (PMC5053603; doi:10.1371/journal.pone.0164285), 2016-10-06
Supplement: pone.0164285.s002.pdf [file pone.0164285.s002.pdf]

**S2 Fig. Overexpression of catalase decreases cellular ROS level**

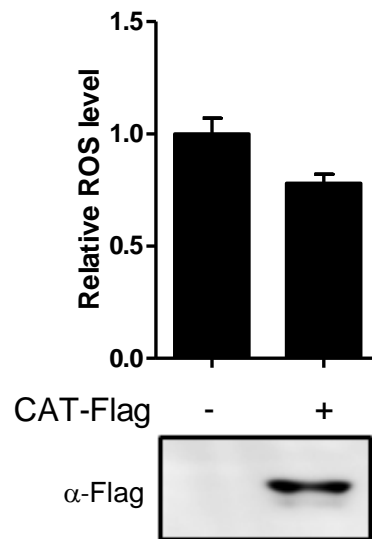

S2 Fig. Flag-tagged catalase was overexpressed in U87-MG cells, cellular ROS level was determined
