# Supplementary material for: HSPB1 Enhances SIRT2-Mediated G6PD Activation and Promotes Glioma Cell Proliferation
Source: PubMed Central journal article supplement (PMC5053603; doi:10.1371/journal.pone.0164285), 2016-10-06
Supplement: pone.0164285.s004.pdf [file pone.0164285.s004.pdf]

**S4 Fig. Knockdown efficiency of shRNAs targeting HSPB1 or G6PD**

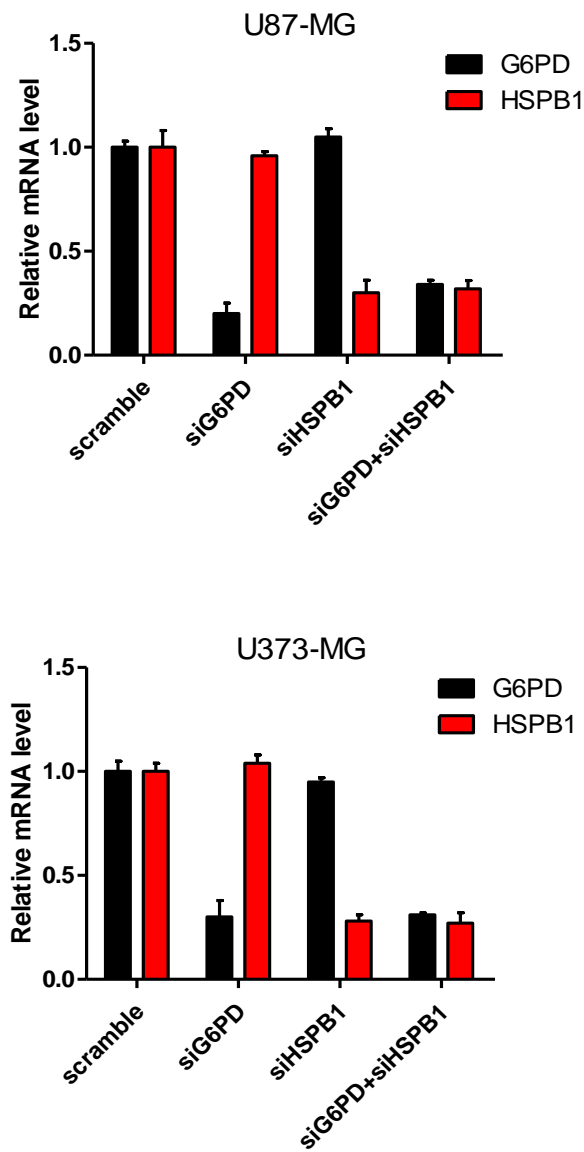

S4 Fig. siRNAs against G6PD and/or HSPB1 was transfected into U87 cells (upper) and U373 cells (lower) as indicated. Knockdown efficiency was determined by qPCR.
